# Supplementary material for: CD4+ T cells aggravate hemorrhagic brain injury
Source: PubMed Central journal article supplement — Sci Adv. 2023 Jun 7;9(23):eabq0712. doi: 10.1126/sciadv.abq0712 (PMC10246900; doi:10.1126/sciadv.abq0712), 2023-06-07
Supplement: sciadv.abq0712_sm.pdf [file sciadv.abq0712_sm.pdf]

Supplementary Materials for  
**CD4<sup>+</sup> T cells aggravate hemorrhagic brain injury**

Samuel X. Shi *et al.*

Corresponding author: Wei-Na Jin, [weina.jin@ncrcnd.org.cn](mailto:weina.jin@ncrcnd.org.cn); Xiaoying Wang, [xwang51@tulane.edu](mailto:xwang51@tulane.edu)

*Sci. Adv.* **9**, eabq0712 (2023)  
DOI: 10.1126/sciadv.abq0712

**This PDF file includes:**

Figs. S1 to S10  
Table S1

## Supplementary Materials

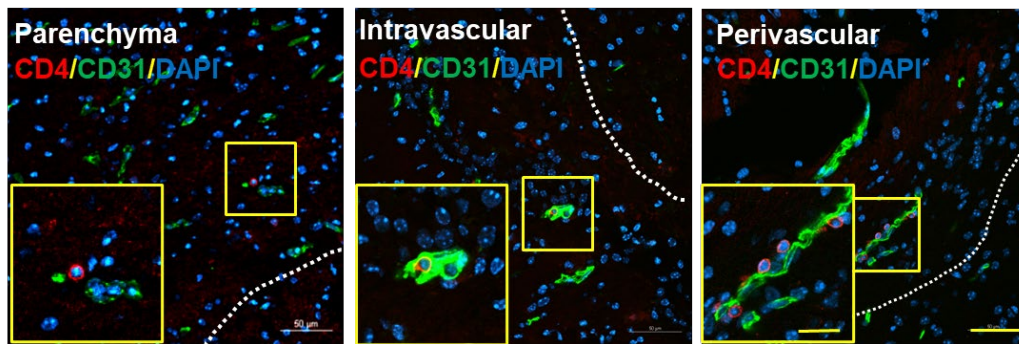

**Fig. S1. The location of CD4<sup>+</sup> T cells in ICH mouse brain.** Immunostaining shows CD4<sup>+</sup> T cells in the perihematomal regions of mice 3 days post ICH surgery. Scale bar: 50 μm (inset: 20 μm).

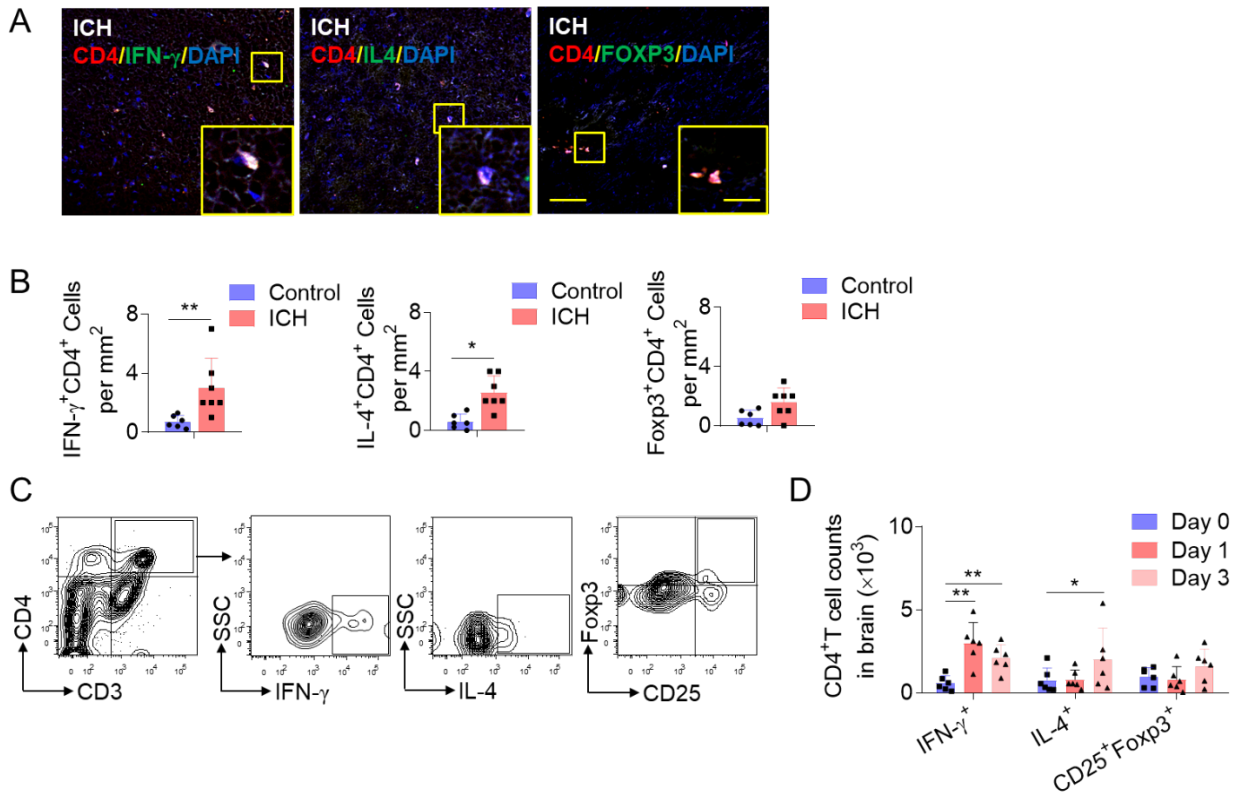

**Fig. S2. T cell subsets in ICH patients and murine models. A-B.** Perihematoma tissues are obtained from brain basal ganglia of ICH patients, who underwent urgent evacuation of hematoma, within 72-hour of onset. Brain tissues for control cases were obtained from individuals that passed from non-neurologic diseases and were without history of neurological or neuropsychiatric conditions, selected tissue sections were region-matched with ICH tissues. Immunostaining (**A**) and quantification (**B**) of Th1 (IFN- $\gamma$ <sup>+</sup>CD4<sup>+</sup>), Th2 (IL-4<sup>+</sup>CD4<sup>+</sup>), and regulatory T (Fcpx3<sup>+</sup>CD4<sup>+</sup>) cells in brain sections from ICH patients in the perihematoma area after ICH and control subjects without neurological disorders. Scale bar: 50  $\mu$ m; inset: 20  $\mu$ m. Quantification was averaged as positive cells per mm<sup>2</sup>. In A and B, ICH patients: n = 7; controls: n = 6. Two-tailed unpaired Student's t-test followed by Mann-Whitney test. Mean  $\pm$  s.e.m. \*p<0.05; \*\*p< 0.01. **C-D.** Flow cytometry plots (**C**) and quantification (**D**) show CD4<sup>+</sup> T cell subsets Th1 (IFN- $\gamma$ <sup>+</sup>CD4<sup>+</sup>), Th2 (IL-4<sup>+</sup>CD4<sup>+</sup>), and regulatory T (CD25<sup>+</sup>Fcpx3<sup>+</sup>CD4<sup>+</sup>) cells in ICH mouse brain from day 0 to day 3. n = 6 mice per group. One-way analysis of variance (ANOVA) followed by Tukey post-hoc test. Mean  $\pm$  SD. \*p<0.05; \*\*p< 0.01.

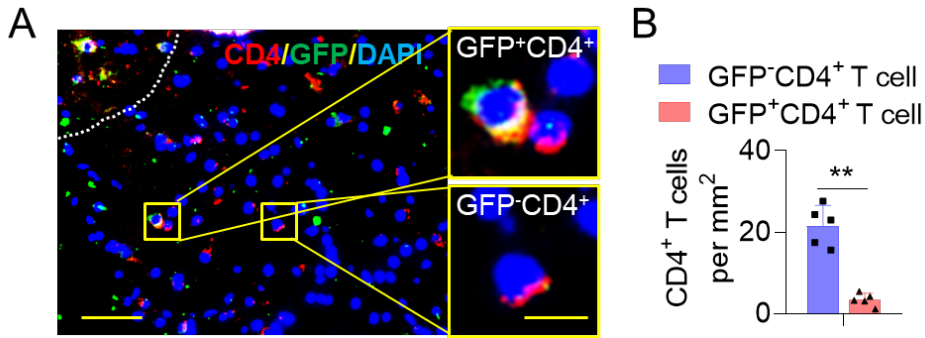

**Fig. S3. Minimal numbers of GFP<sup>+</sup>CD4<sup>+</sup> T cells appeared in mouse PHE areas 72h post ICH surgery.** Blood mononuclear cells from UBC-GFP mice were injected into the brain of wild-type mice with ICH. After 72h, GFP<sup>+</sup>CD4<sup>+</sup> T cells presented in PHE areas were calculated. Immunostaining (**A**) and quantification (**B**) of GFP<sup>-</sup>CD4<sup>+</sup> and GFP<sup>+</sup>CD4<sup>+</sup> T cells in the PHE areas of mice 3 days post ICH surgery. Scale bar: 40  $\mu$ m (inset: 10  $\mu$ m). n=5 mice per group. Two-tailed unpaired Student's t-test followed by Mann-Whitney test. Mean  $\pm$  SD. \*\*p< 0.01.

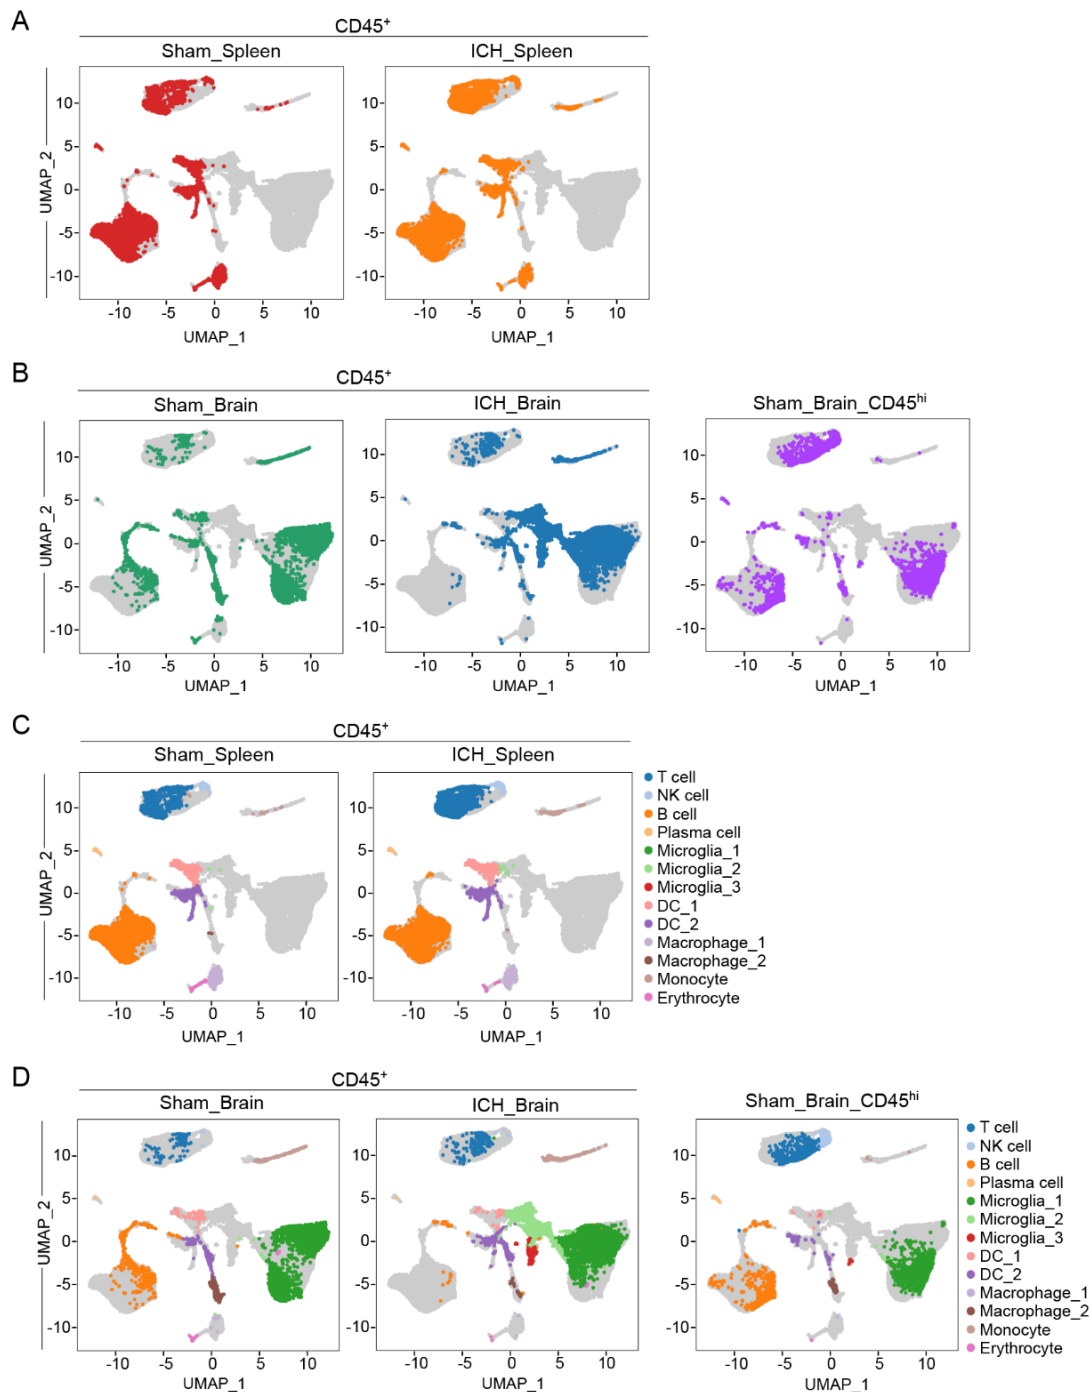

**Fig. S4. The individual UMAP of cell clusters isolated from brain and spleen of sham and ICH mice.** CD45<sup>+</sup> cells were isolated from splenocytes or brain tissues of C57BL/6 mice 72 hours after ICH induction using fluorescence activated cell sorting. CD45<sup>+</sup> cells splenic (Sham spleen) or brain (Sham brain\_CD45<sup>+</sup>) cells from sham-operated mice were used as controls, for unbiasedly single-cell RNA mapping. The optimized FACS-sorting were performed on CD45<sup>hi</sup> cell population, to obtain enough CD4<sup>+</sup> T cells in sham brains for sub-clustering and data processing (Sham brain\_CD45<sup>hi</sup>). The single-cell RNA-sequencing was performed using the 10x Genomics Chromium platform. Uniform Manifold Approximation and Projection (UMAP) plot along components 1 and 2 for all high-quality single cells from ICH brain, ICH spleen, sham brain, sham spleen colored by group (**A-B**) and cell type (**C-D**) were displayed individually.

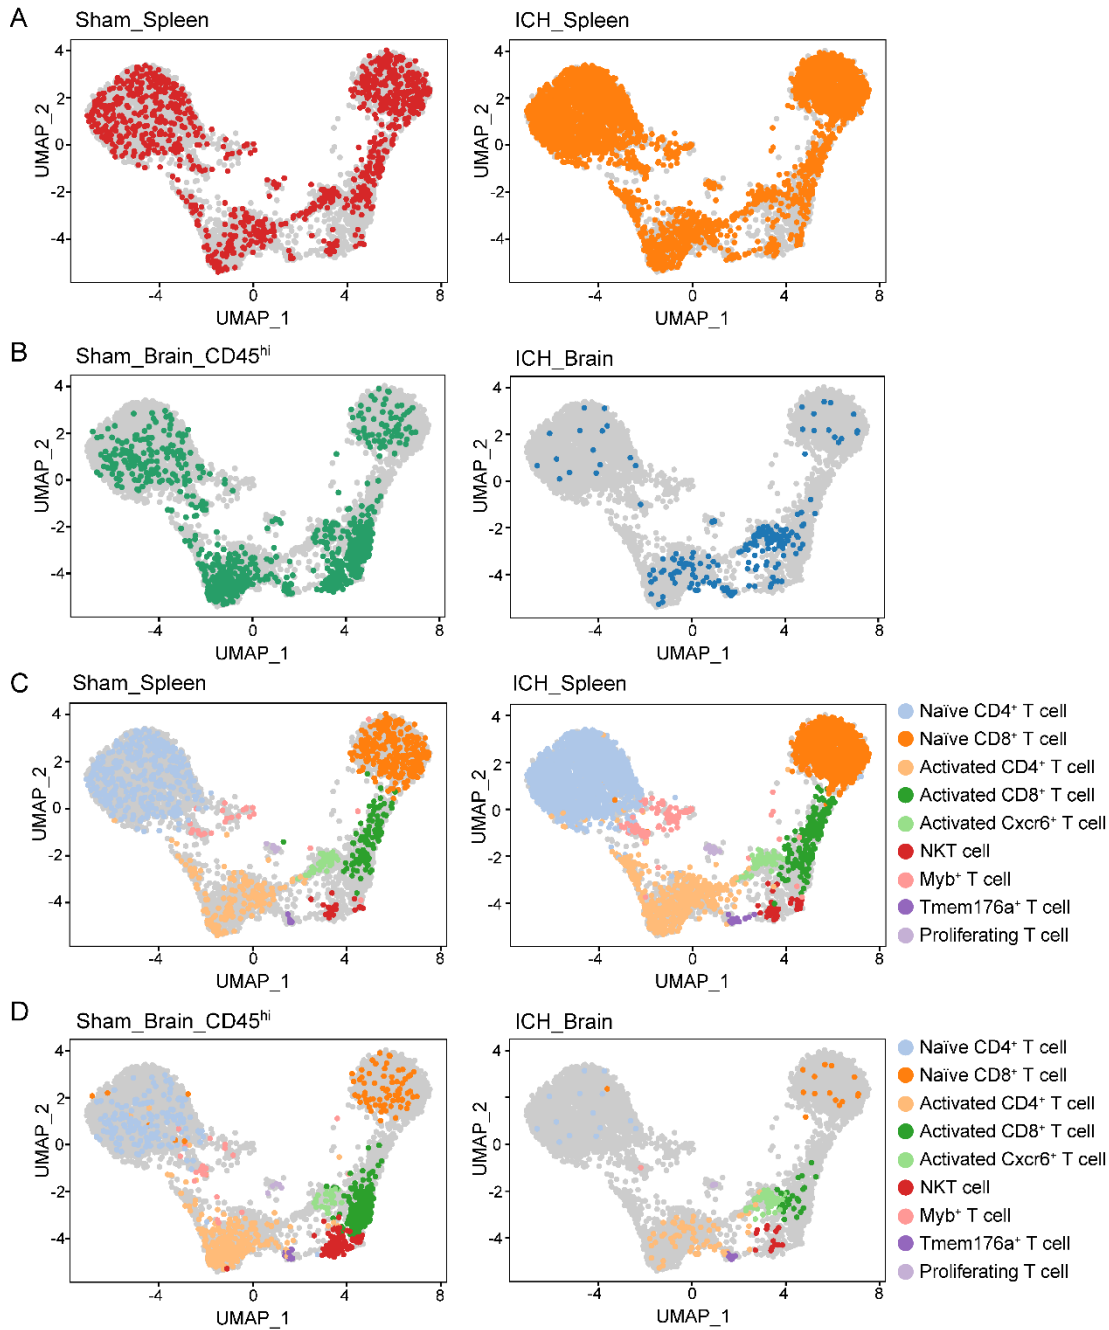

**Fig. S5.** The individual UMAP of CD3<sup>+</sup> T cells were re-clustered from CD45<sup>+</sup> cell populations based on the single-cell RNA-sequencing data. **A-B.** UMAP plot showing T cell subtypes from ICH brain, ICH spleen, sham brain (CD45<sup>hi</sup>), sham spleen, colored by group (**A-B**) and cell type (**C-D**) were displayed individually.

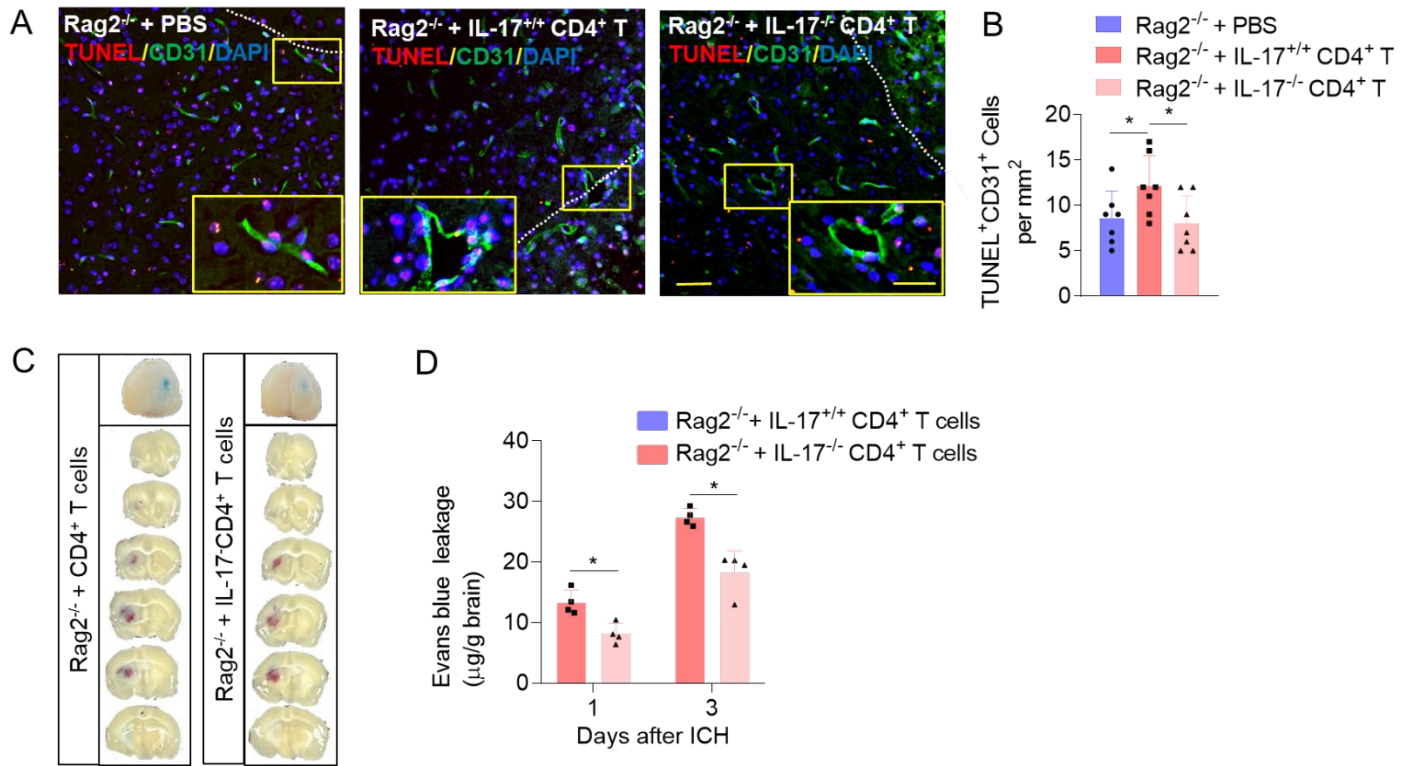

**Fig S6. CD4<sup>+</sup> T cell-induced endothelial apoptosis and BBB disruption were worsened by IL-17 signaling. A-B.** Immunostaining (**A**) and quantification (**B**) of TUNEL in CD31<sup>+</sup> endothelial cells in Rag2<sup>-/-</sup> mice, Rag2<sup>-/-</sup> mice receiving IL-17<sup>+/+</sup> CD4<sup>+</sup> cells and IL-17<sup>-/-</sup> CD4<sup>+</sup> cells at day 3 after ICH. Scale bar: 50 µm; inset: 20 µm. n=7 mice per group. Mann-Whitney test. **C-D.** The concentrations of Evans blue were measured at 1 and 3 days after ICH in Rag2<sup>-/-</sup> mice receiving IL-17<sup>+/+</sup> CD4<sup>+</sup> cells or IL-17<sup>-/-</sup> CD4<sup>+</sup> cells separately. n=4 mice per group. Mann-Whitney test. Mean ± SD. \*p< 0.05.

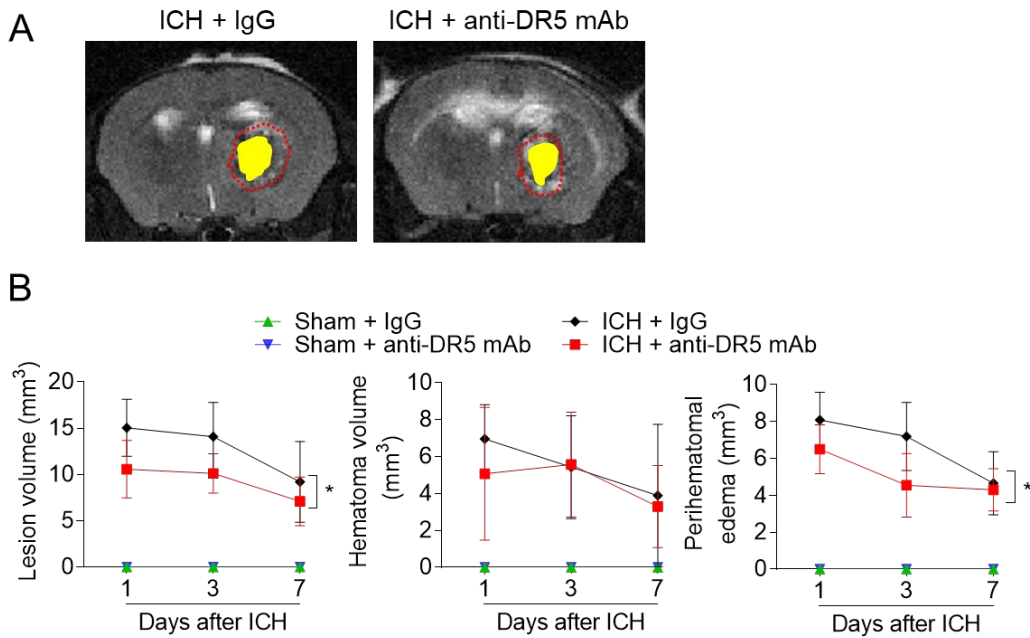

**Fig S7. Disturbed DR5 pathway effectively blocked ICH injury in mouse brain. A.** Mice were injected intraperitoneally with 100  $\mu$ g anti-DR5 mAb (MD5-1) to deplete TRAIL receptor DR5 at 24 hours before ICH induction. **B.** Quantification of lesion volume, hematoma and PHE volume were calculated in the indicated groups. n=5 mice per group. Two-way ANOVA accompanied by Tukey post hoc test. Mean  $\pm$ SD. \*p< 0.05.



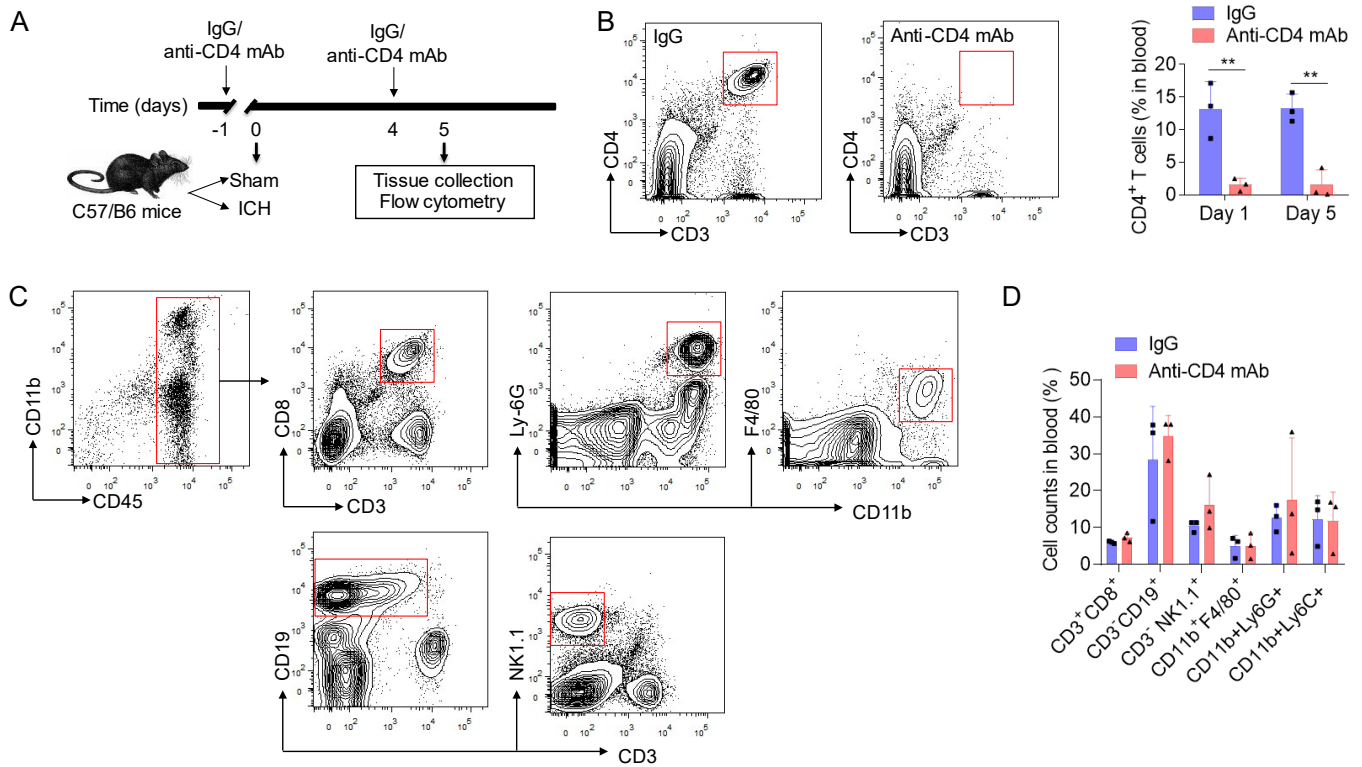

**Fig. S8. Effect of CD4<sup>+</sup> T cells depletion with anti-CD4 mAb treatment.** CD4<sup>+</sup> T cells in peripheral blood were detected from mice receiving IgG control or anti-CD4 mAb, separately. **A-B.** The schematic graph showing the treatment of IgG control or anti-CD4 mAb (**A**). Anti-CD4 monoclonal antibody was intraperitoneally injected at 24 hours before ICH induction, and every five days until the end of experiments. CD4<sup>+</sup> T cells were evaluated by flow cytometry analysis at day 1 and day 5 post model induction (**B**). **C-D.** Flow cytometry gating strategy and quantification of lymphocyte subsets in peripheral blood at day 5 post model induction. n=3 mice per group. Mann-Whitney test. Mean  $\pm$  SD. \*\*p< 0.01.

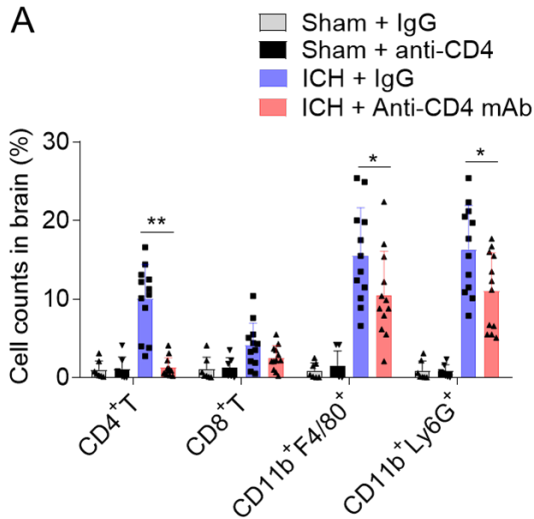

**Fig. S9. Depletion of CD4<sup>+</sup> T cells reduce leucocyte infiltration in brain of ICH mice as compared to sham control.** Single cell suspensions from brain tissue were collected at day 3 after ICH or sham mice. **A.** Counts of the immune cell populations in brains from sham or ICH mice receiving anti-CD4 mAb or IgG, including brain-infiltrating neutrophils (CD11b<sup>+</sup>CD45<sup>hi</sup>Ly6G<sup>+</sup>), monocytes/macrophages (CD11b<sup>+</sup>CD45<sup>hi</sup>F4/80<sup>+</sup>), CD4<sup>+</sup> T cells (CD45<sup>hi</sup>CD3<sup>+</sup>CD4<sup>+</sup>) and CD8<sup>+</sup> T cells (CD45<sup>hi</sup>CD3<sup>+</sup>CD8<sup>+</sup>). n =12 per group. Two-tailed unpaired Student's t-test. Mean  $\pm$  SD. \*p< 0.05, \*\*p< 0.01.

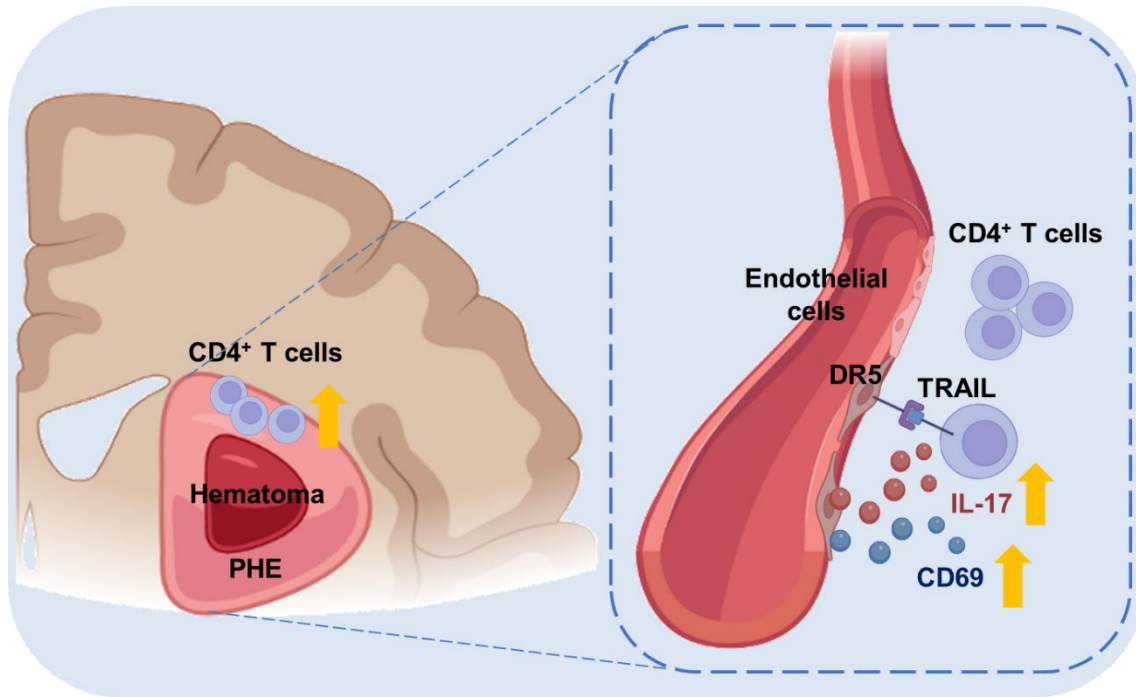

**Fig S10. CD4<sup>+</sup> T cells are recruited into the brain and commit secondary neural injury involving pro-inflammatory and pro-apoptotic actions following hemorrhagic stroke.** After hemorrhagic stroke, CD4<sup>+</sup> T cells are preferentially recruited to and activated in the ICH brain. CD4<sup>+</sup> T cells accumulated in the peri-hematoma region and drives local inflammation via IL-17 production and engagement of endothelial bearing cell death receptor, leading to diminishing BBB integrity and augmenting brain edema. PHE, perihematomal edema. TRAIL, tumor necrosis factor-related apoptosis-inducing ligand.

**Table S1. Information of signature genes in individual cell subtypes based on UMAP cluster.**

| gene   | avg_logFC   | pct.1 | pct.2 | p_val | p_val_adj | cluster     |
|--------|-------------|-------|-------|-------|-----------|-------------|
| Trbc2  | 2.653518658 | 0.919 | 0.04  | 0     | 0         | T cell      |
| Cd3d   | 2.123214012 | 0.875 | 0.024 | 0     | 0         | T cell      |
| Trbc1  | 2.074681306 | 0.556 | 0.032 | 0     | 0         | T cell      |
| Ms4a4b | 2.071596993 | 0.868 | 0.092 | 0     | 0         | T cell      |
| Cd3g   | 2.02811362  | 0.851 | 0.021 | 0     | 0         | T cell      |
| Gzma   | 3.978135255 | 0.741 | 0.01  | 0     | 0         | NK cell     |
| Ccl5   | 3.359740814 | 0.991 | 0.093 | 0     | 0         | NK cell     |
| Nkg7   | 2.767603138 | 0.887 | 0.08  | 0     | 0         | NK cell     |
| Klre1  | 2.28178449  | 0.655 | 0.011 | 0     | 0         | NK cell     |
| Klra4  | 2.267537558 | 0.445 | 0.002 | 0     | 0         | NK cell     |
| Cd79a  | 3.049599166 | 0.983 | 0.051 | 0     | 0         | B cell      |
| Ly6d   | 2.882041749 | 0.952 | 0.064 | 0     | 0         | B cell      |
| Ms4a1  | 2.808811475 | 0.959 | 0.04  | 0     | 0         | B cell      |
| Ebf1   | 2.718845957 | 0.979 | 0.039 | 0     | 0         | B cell      |
| Cd79b  | 2.586438193 | 0.96  | 0.163 | 0     | 0         | B cell      |
| Jchain | 5.750721327 | 0.991 | 0.084 | 0     | 0         | Plasma cell |
| Iglv1  | 2.715204148 | 0.797 | 0.015 | 0     | 0         | Plasma cell |
| Derl3  | 1.617681629 | 0.915 | 0.018 | 0     | 0         | Plasma cell |
| Eaf2   | 1.50956576  | 0.934 | 0.018 | 0     | 0         | Plasma cell |
| Fkbp11 | 1.415229399 | 0.788 | 0.025 | 0     | 0         | Plasma cell |
| Cst3   | 3.054318658 | 1     | 0.659 | 0     | 0         | Microglia_1 |
| Hexb   | 2.99280809  | 1     | 0.439 | 0     | 0         | Microglia_1 |
| Cx3cr1 | 2.962822992 | 0.998 | 0.164 | 0     | 0         | Microglia_1 |
| Sparc  | 2.877620467 | 0.997 | 0.116 | 0     | 0         | Microglia_1 |
| P2ry12 | 2.648085887 | 0.987 | 0.103 | 0     | 0         | Microglia_1 |
| Spp1   | 3.062447573 | 0.9   | 0.243 | 0     | 0         | Microglia_2 |
| Fabp5  | 2.983279124 | 0.857 | 0.217 | 0     | 0         | Microglia_2 |
| Arg1   | 2.93347129  | 0.725 | 0.073 | 0     | 0         | Microglia_2 |
| Pf4    | 2.807707945 | 0.775 | 0.086 | 0     | 0         | Microglia_2 |
| Hmox1  | 2.602153266 | 0.937 | 0.338 | 0     | 0         | Microglia_2 |
| Ttr    | 5.432057613 | 1     | 0.368 | 0     | 0         | Microglia_3 |
| Enpp2  | 4.156174472 | 0.996 | 0.191 | 0     | 0         | Microglia_3 |
| Ptgds  | 2.665228579 | 0.887 | 0.045 | 0     | 0         | Microglia_3 |
| Clu    | 2.530729453 | 0.899 | 0.038 | 0     | 0         | Microglia_3 |
| Trpm3  | 2.249992149 | 0.873 | 0.02  | 0     | 0         | Microglia_3 |
| Tbc1d4 | 2.363980654 | 0.666 | 0.083 | 0     | 0         | DC_1        |
| H2-Eb1 | 2.085894421 | 0.997 | 0.424 | 0     | 0         | DC_1        |
| H2-Ab1 | 2.069165752 | 0.993 | 0.468 | 0     | 0         | DC_1        |
| H2-Aa  | 1.989427664 | 0.988 | 0.462 | 0     | 0         | DC_1        |
| S100a4 | 1.881347798 | 0.807 | 0.151 | 0     | 0         | DC_1        |
| Lyz2   | 2.741214797 | 0.999 | 0.443 | 0     | 0         | DC_2        |
| Ifitm3 | 2.731779222 | 1     | 0.248 | 0     | 0         | DC_2        |
| S100a4 | 2.251648454 | 0.936 | 0.148 | 0     | 0         | DC_2        |
| Plac8  | 2.126483677 | 0.968 | 0.313 | 0     | 0         | DC_2        |
| Cybb   | 2.033165528 | 0.994 | 0.352 | 0     | 0         | DC_2        |

---

|         |             |       |       |   |   |             |
|---------|-------------|-------|-------|---|---|-------------|
| Ly6c2   | 2.514870582 | 0.99  | 0.091 | 0 | 0 | DC_3        |
| Runx2   | 2.36656234  | 0.984 | 0.056 | 0 | 0 | DC_3        |
| Ccr9    | 2.356723604 | 0.927 | 0.038 | 0 | 0 | DC_3        |
| Cd209d  | 2.274470313 | 0.828 | 0.006 | 0 | 0 | DC_3        |
| Cox6a2  | 1.984111431 | 0.792 | 0.029 | 0 | 0 | DC_3        |
| Vcam1   | 4.335884502 | 1     | 0.076 | 0 | 0 | Macrophage  |
| Slc40a1 | 3.579870404 | 1     | 0.226 | 0 | 0 | Macrophage  |
| Axl     | 2.736382786 | 0.996 | 0.066 | 0 | 0 | Macrophage  |
| Mrc1    | 2.704581856 | 0.995 | 0.067 | 0 | 0 | Macrophage  |
| Slpi    | 2.618409231 | 0.951 | 0.08  | 0 | 0 | Macrophage  |
| S100a9  | 5.762431984 | 0.91  | 0.149 | 0 | 0 | Monocyte    |
| S100a8  | 5.600455883 | 0.937 | 0.134 | 0 | 0 | Monocyte    |
| Cxcl2   | 4.38968521  | 0.803 | 0.135 | 0 | 0 | Monocyte    |
| Retnlg  | 4.281034334 | 0.579 | 0.022 | 0 | 0 | Monocyte    |
| Il1b    | 4.042037472 | 0.929 | 0.098 | 0 | 0 | Monocyte    |
| Slc4a1  | 3.285102082 | 1     | 0.003 | 0 | 0 | Erythrocyte |
| Alas2   | 3.215354615 | 1     | 0.004 | 0 | 0 | Erythrocyte |
| Gypa    | 3.032222711 | 0.983 | 0.002 | 0 | 0 | Erythrocyte |
| Hemgn   | 2.907586008 | 0.883 | 0.003 | 0 | 0 | Erythrocyte |
| Snca    | 2.794599206 | 1     | 0.004 | 0 | 0 | Erythrocyte |
| Flt1    | 3.011654877 | 0.504 | 0.021 | 0 | 0 | Ptprc-      |
| Cldn5   | 2.939117166 | 0.408 | 0.007 | 0 | 0 | Ptprc-      |
| Igfbp7  | 2.548746486 | 0.535 | 0.02  | 0 | 0 | Ptprc-      |
| Ptn     | 2.478432163 | 0.539 | 0.01  | 0 | 0 | Ptprc-      |
| Sparcl1 | 2.434192829 | 0.649 | 0.019 | 0 | 0 | Ptprc-      |

---
